# Supplementary material
Source: PubMed Central journal article supplement (PMC2861376)
Supplement: SD1.pdf [file SD1.pdf]

APPENDIX  
 Details of statistical models: design of survey illustrating nested structure

| Level 3: District ( <i>k</i> ) (constant artemisinin-based combination therapy [ACT] policy and hence duration within each district) | 1             | 2             | 3             | 4              | 5              | 6              | 7              |
|--------------------------------------------------------------------------------------------------------------------------------------|---------------|---------------|---------------|----------------|----------------|----------------|----------------|
| Level 2: Site within district ( <i>j</i> ) (constant mutation and parasite prevalence within each site)                              | 1             | 2             | 3             | 4              | 5              | 6              | 7              |
| Level 1: Parasitic children within sentinel sites ( <i>i</i> )                                                                       | 1             | 2             | 3             | 4              | 5              | 6              | 7              |
|                                                                                                                                      | <i>N</i> = 53 | <i>N</i> = 52 | <i>N</i> = 90 | <i>N</i> = 168 | <i>N</i> = 100 | <i>N</i> = 100 | <i>N</i> = 241 |
|                                                                                                                                      | <i>N</i> = 94 | <i>N</i> = 38 | <i>N</i> = 90 | <i>N</i> = 143 | <i>N</i> = 21  | <i>N</i> = 235 | <i>N</i> = 40  |
|                                                                                                                                      | <i>N</i> = 14 | <i>N</i> = 30 | <i>N</i> = 14 | <i>N</i> = 18  | <i>N</i> = 18  | <i>N</i> = 18  | <i>N</i> = 18  |
|                                                                                                                                      | <i>N</i> = 23 | <i>N</i> = 70 | <i>N</i> = 70 | <i>N</i> = 141 | <i>N</i> = 50  | <i>N</i> = 55  | <i>N</i> = 19  |
|                                                                                                                                      | <i>N</i> = 14 | <i>N</i> = 19 | <i>N</i> = 25 | <i>N</i> = 26  | <i>N</i> = 24  | <i>N</i> = 23  | <i>N</i> = 25  |

Logistic model for log (odds of quintuple mutation) as a function of parasite prevalence and duration of ACT policy:

$$\text{logit}(p_{ijk}) = -2.464 - 0.019 \times \text{paraprev} + 0.112 \times \text{ACTmonths} + a_k^{(2)} + a_j^{(3)} + \epsilon_{ijk}$$

where  $p_{ijk}$  = probability of a quintuple mutation for subject *i* in sentinel site *j* in district *k*

$$a_k^{(2)} \sim N(0, \sigma_k^2) = \text{random effect for second level nesting factor, sentinel sites } (\sigma_k^2 \text{ measures between site variability})$$

$$a_j^{(3)} \sim N(0, \sigma_j^2) = \text{random effect for third level nesting factor, districts } (\sigma_j^2 \text{ measures between district variability})$$

$$a_{ijk}^{(1)} \sim N(0, \sigma_{ij}^2) = \text{random effect for first level factor, subjects } (\sigma_{ij}^2 \text{ measures between subject variability})$$

All random effects are independent of one another.
